# Supplementary material
Source: PubMed Central journal article supplement (PMC7274968)
Supplement: mmc1.pdf [file mmc1.pdf]

**A**

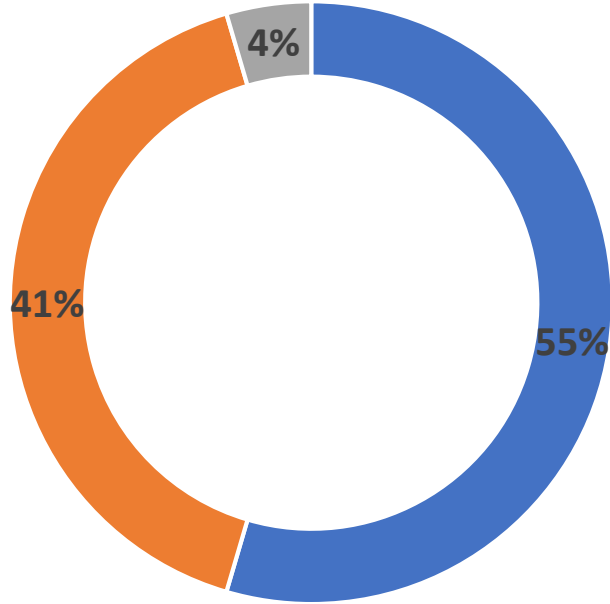

- None
- Less than 5%
- Between 5% and 10%

**Number of patients diagnosed with COVID-19**

**B**

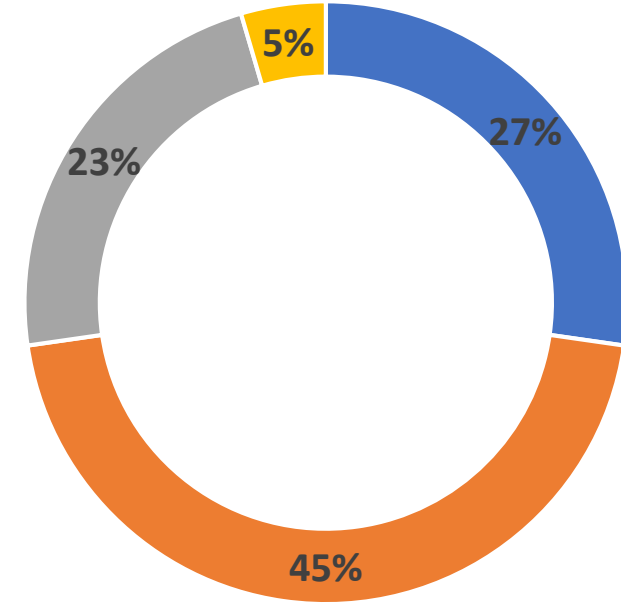

- No reduction
- Less than 20%
- Between 20% and 50%
- More than 50%

**Estimated reduction of the daily activity**
