# Supplementary material
Source: PubMed Central journal article supplement (PMC7274968)

# Cumulative COVID-19 deaths in Switzerland

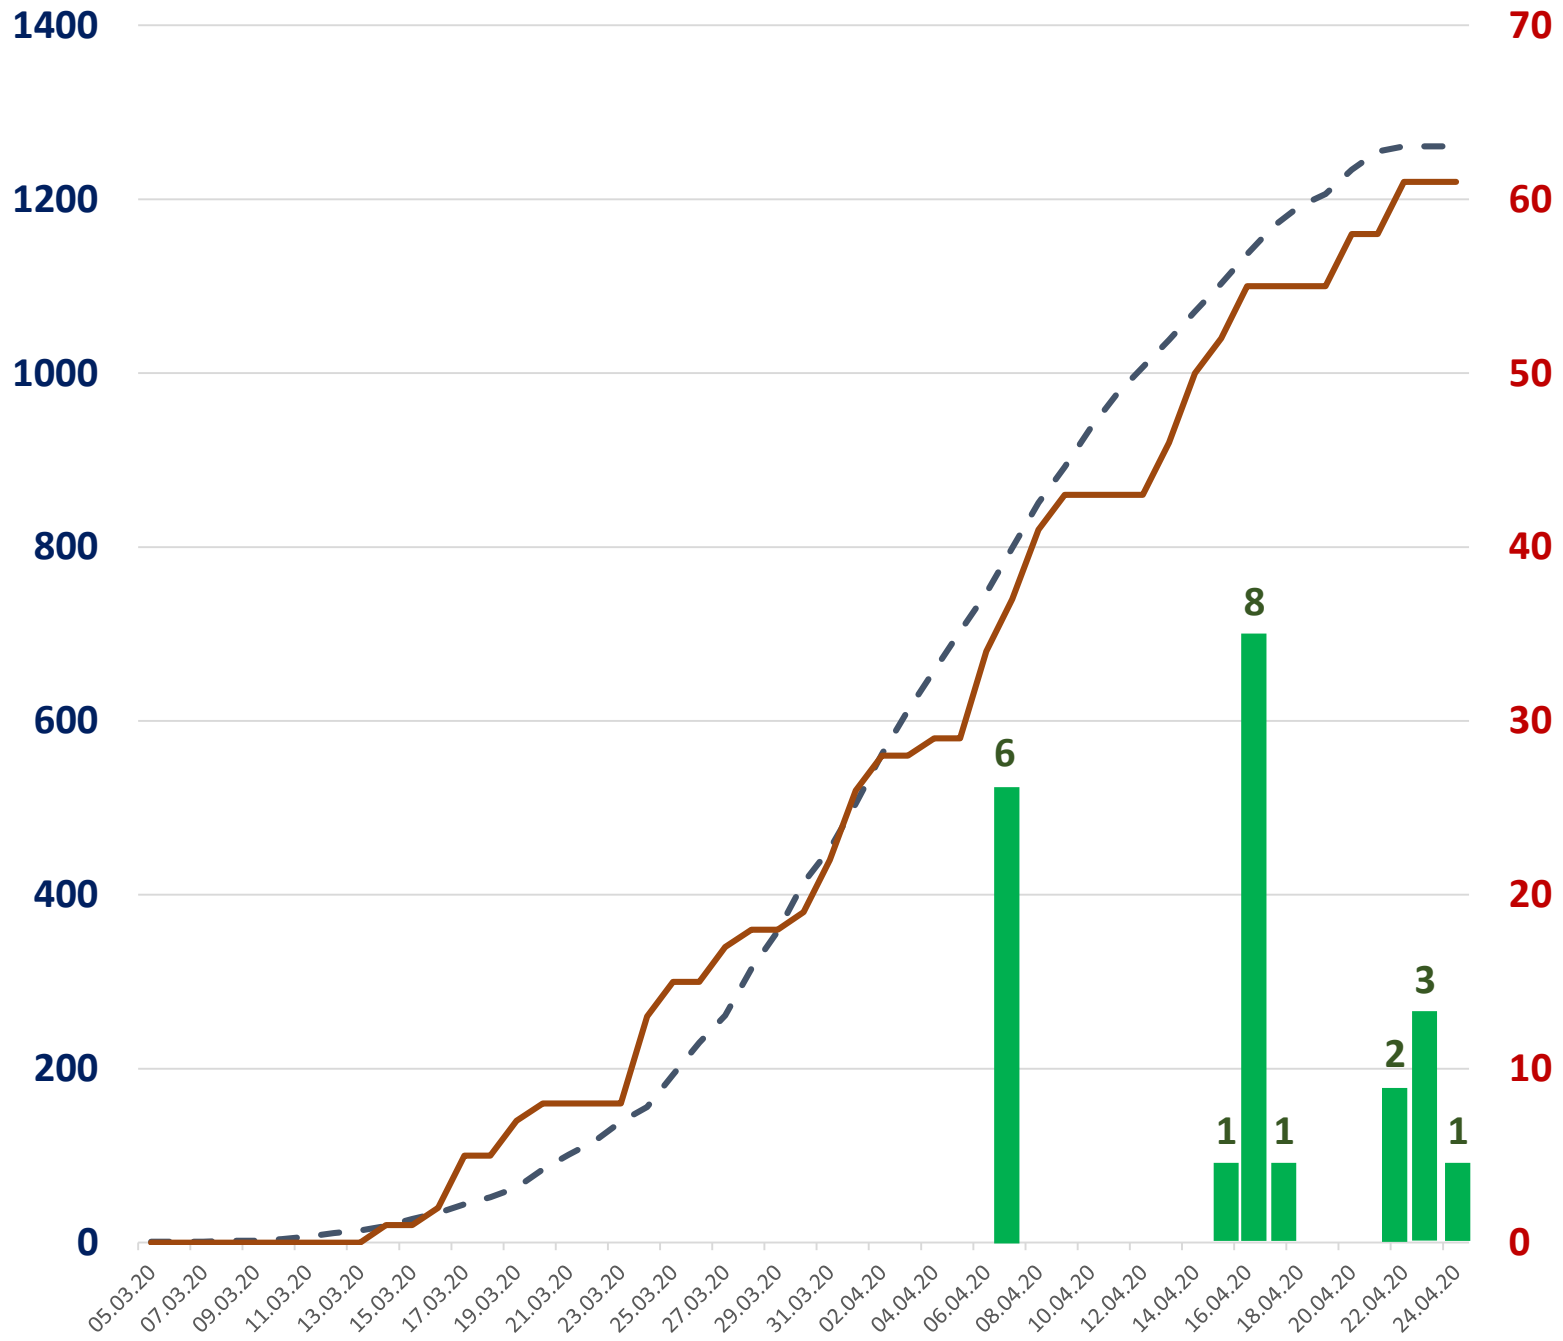

# Cumulative COVID-19 papers from ASTRO/ESTRO journals

Supplement: mmc2.pdf [file mmc2.pdf]
